# Supplementary material
Source: Royal Society of Chemistry journal article supplement (doi:10.1039/d5nr05412e)
Supplement: d5nr05412e1.pdf [file d5nr05412e1.pdf]

## Supporting Information

### **Covalent organic framework-modified poly acrylic acid binder enhances cycling performance of silicon-carbon anodes**

Juan Li<sup>a\*</sup>, Jiajia Gao<sup>a</sup>, Lin Rong Yue<sup>a</sup>, Zhongyuan Zheng<sup>b</sup>, Yukun Liu<sup>a</sup>, Xin Wang<sup>a</sup>,

Dongsheng Wang<sup>a</sup>

*a, Institute of Crystalline Materials, Shanxi University, Wucheng Rd, No 92, Taiyuan  
030006, China.*

E-mail

address:

lj0511@sxu.edu.cn

## **Materials.**

4,4'-Diamino-1,1'-biphenyl-3,3'-dicarboxylic acid (DCAP) and 2,4,6-triformylphloroglucinol (TFP) were purchased from Alfa Aesar (China) Chemicals Co., Ltd.. Mesitylene and 1,4-dioxane were purchased from TCI (Shanghai) Development Co., Ltd. Polyacrylic acid was purchased from Merck Group, Germany. Silicon carbide (1200) was purchased from Dongguan Kelude Experimental Equipment Technology Co., Ltd. Carbon nanotubes (CNT) were purchased from Shenzhen Nanotech Port Co., Ltd.

## **Characterization.**

Scanning electron microscopy (SEM) analysis was conducted using a JEOL JSM-7900 instrument operated at 10 kV accelerating voltage. Fourier transform infrared (FTIR) spectra were acquired on a Thermo Scientific Nicolet iS5 spectrometer over the range of 4000-500  $\text{cm}^{-1}$  with 5  $\text{cm}^{-1}$  resolution and 32 co-added scans. X-ray diffraction (XRD) patterns were collected on a Rigaku Ultima IV diffractometer equipped with  $\text{Cu K}_\alpha$  radiation ( $\lambda = 1.5406 \text{ \AA}$ ), scanning  $2\theta$  angles from  $2^\circ$  to  $40^\circ$  at a rate of  $5^\circ \text{ min}^{-1}$ . Electrochemical cycling performance was evaluated using a Land CT2100A battery test system under controlled current conditions. The galvanostatic discharge/charge tests and galvanostatic intermittent titration (GITT) measurement were performed on a CT2001A (LAND, Wuhan) battery test system in the voltage range from 0.01 to 3.0 V. The battery was subjected to cyclic voltammetry tests using the Shanghai Chenhua CHI 660C electrochemical workstation at a scanning rate of  $0.25 \text{ mV s}^{-1}$  and a voltage range of 1.5 V to 0.01 V (vs  $\text{Li/Li}^+$ ). Nitrogen sorption isotherms were measured at 77 K with a Micromeritics Instrument Corporation model 3Flex surface characterization analyzer. The Brunauer-Emmett-Teller (BET) method was utilized to calculate the specific surface area. TGA measurements were performed on a Mettler-Toledo model TGA/SDTA851e under  $\text{N}_2$  by heating to  $800^\circ \text{C}$  at a rate of  $10^\circ \text{C min}^{-1}$ . Transmittance Electron Microscopy (TEM) was measured on Tecnai G2 F20 S-Twin (FEI). X-ray photoelectron spectroscopy (XPS) was measured on the PHI-5702 instrument and the  $\text{C1s}$  line at 284.5 eV was used as the binding energy reference. The element dispersion

(EDS) experiments was carried out on a JEOL-2100F microscope. Element analysis was performed on vario EL CUBE. Electrochemical impedance spectroscopy (EIS) testing serves as a crucial method for investigating battery resistance variations. This study employed the SOLARTRON testing workstation for EIS measurements. With the measured electrode as the core unit, a symmetrical structure is constructed by covering a layer of diaphragm on both sides. Then, an appropriate amount of electrolyte is added to ensure that all components are fully immersed. Following data acquisition, Zview software was utilized to perform curve fitting, enabling the derivation of resistance profiles and subsequent analysis of resistance changes in both the battery assembly and electrode substrates. This experiment utilized the FISCHERSCOPE HM2000 S instrument for nanoindentation analysis. The test parameters were set as follows: The indenter was applied at a rate of 1.000 mN/s to a preset displacement of 4000 nm, followed by a 2-second dwell at this displacement to maintain constant load on the electrode sheet before unloading. Throughout the process, real-time data was collected on the relationship between load (P) and indentation depth (h). By conducting nanoindentation tests on composite electrodes, force-displacement curves were obtained, which enabled further calculation of key mechanical properties such as modulus and hardness.

### **Computational Studies.**

The crystalline structure of Tp-DCAP-COF was determined using the density-functional tight-binding (DFTB<sup>+</sup>) method including Lennard-Jones (LJ) dispersion. The calculations were carried out with the DFTB<sup>+</sup> program package version 1.2. DFTB is an approximate density functional theory method based on the tight binding approach and utilizes an optimized minimal LCAO Slater-type all-valence basis set in combination with a two-center approximation for Hamiltonian matrix elements. The Coulombic interaction between partial atomic charges was determined using the self-consistent charge (SCC) formalism. Lennard-Jones type dispersion was employed in all calculations to describe van der Waals (vdW) and  $\pi$ -stacking interactions. The lattice dimensions were optimized simultaneously with the geometry. Standard DFTB

parameters for X-Y element pair (X, Y = C, O, H, and N) interactions were employed from the mio-0-1 set.

### **Pawley Refinement.**

Molecular modeling and Pawley refinement were carried out using Reflex, a software package for crystal determination from XRD pattern, implemented in MS modeling version 4.4 (Accelrys Inc.). Initially, unit cell dimensions for hexagonal lattice were taken from the DFTB calculation and the space group for hexagonal crystal system were selected as P1, respectively. Pawley refinement was performed for hexagonal lattice to optimize the lattice parameters iteratively until the  $R_W$  and  $R_{WP}$  values converge. The pseudo Voigt profile function was used for whole profile fitting and Berrar-Baldinozzi function was used for asymmetry correction during the refinement processes.

## Supporting Figures

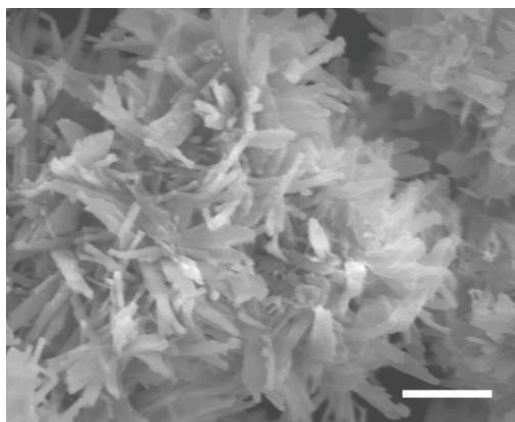

**Figure S1.** SEM image of Tp-DCAP-COF

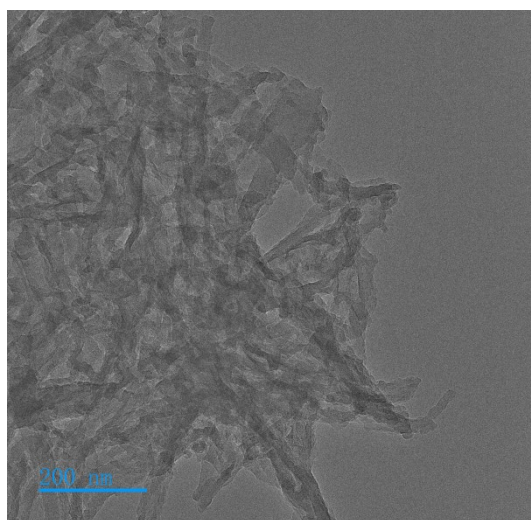

**Figure S2.** TEM image of Tp-DCAP-COF.

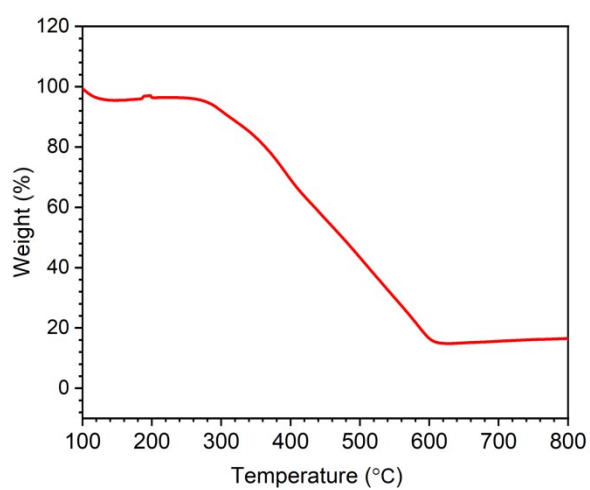

**Figure S3.** TGA curve of Tp-DCAP-COF

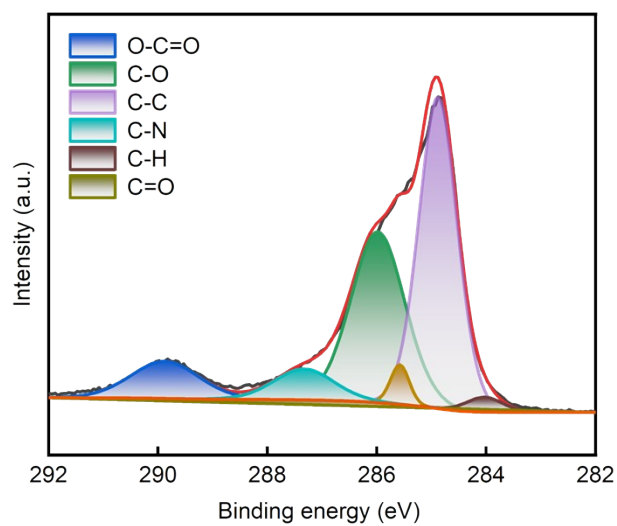

**Figure S4.** C 1s spectrum of Si/C@PAA/Tp-DCAP-COF.

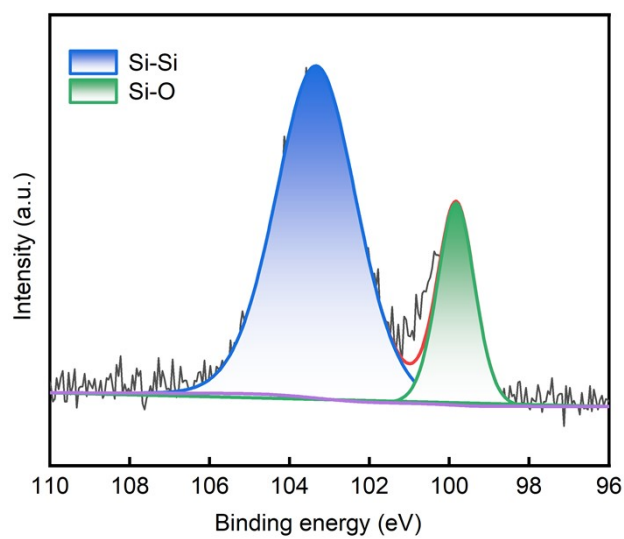

**Figure S5.** Si 2p spectrum of Si/C@-PAA/Tp-DCAP-COF.

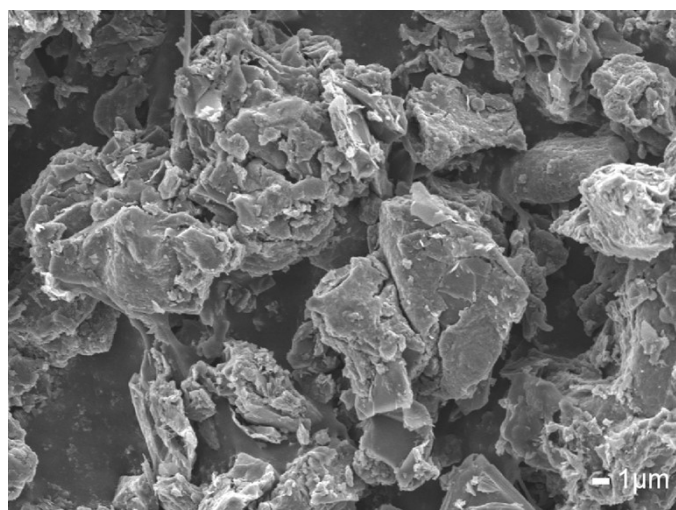

**Figure S6.** SEM image of Si/C used in this work.

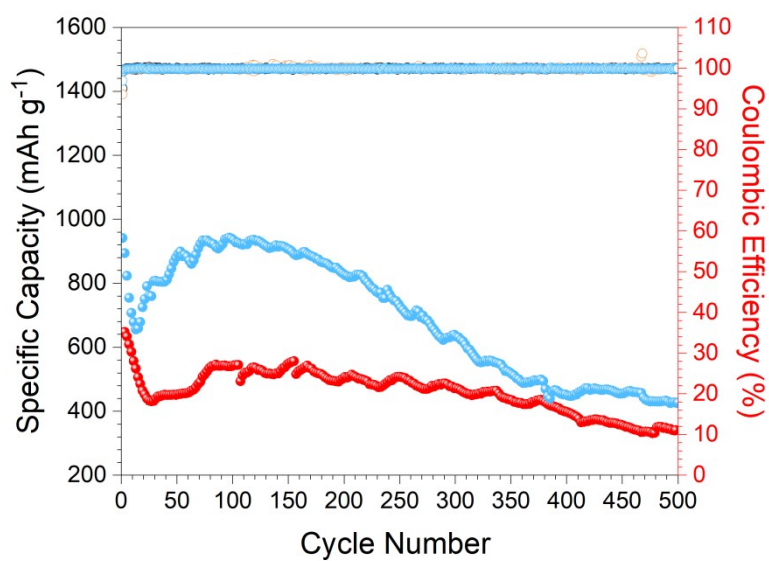

**Figure S7.** Cycling performance of Si/C//Li batteries equipped with Si/C bound by PAA/Tp-DCAP-COF (blue) and PAA (red) over 500 cycles.

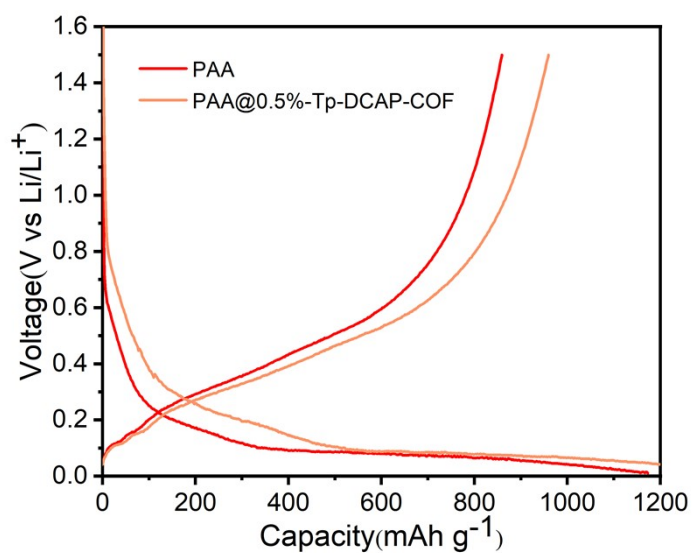

**Figure S8.** The first-cycle charge-discharge curves of PAA and PAA/Tp-DCAP-COF

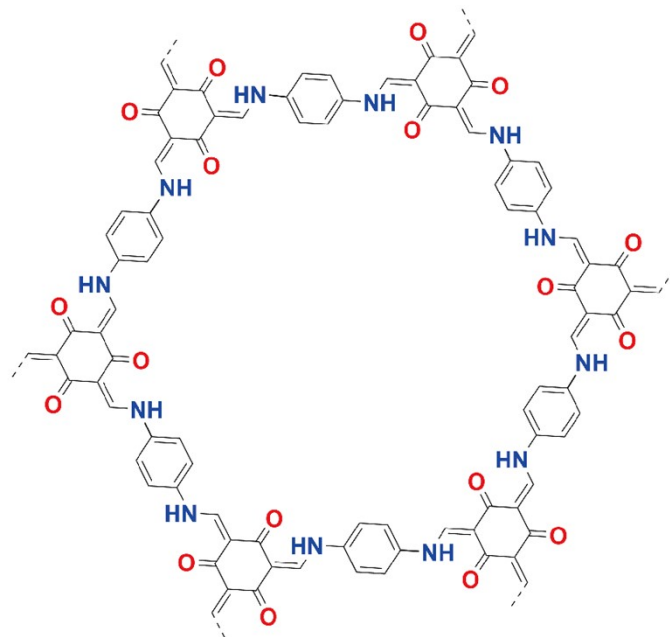

**Tp-PA-COF**

**Figure S9.** Chemical structure of Tp-PA-COF.

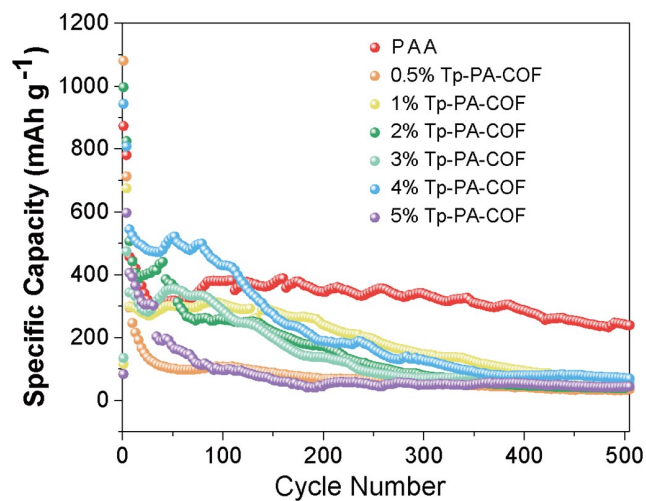

**Figure S10.** Cycling performance of Si/C//Li battery equipped with Si/C bound by PAA/Tp-PA-COF composite binders with COFs in different weight ratios over 500 cycles(0.5%-5%).

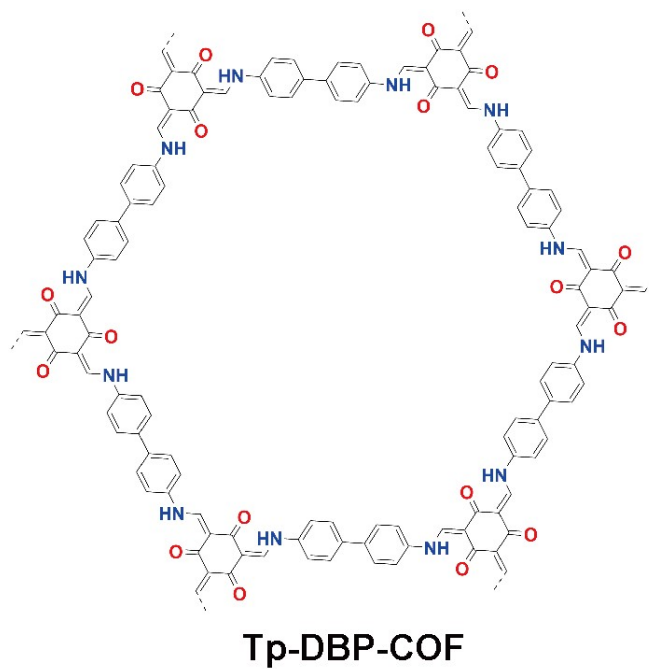

**Figure S11.** Chemical structure of Tp-DBP-COF.

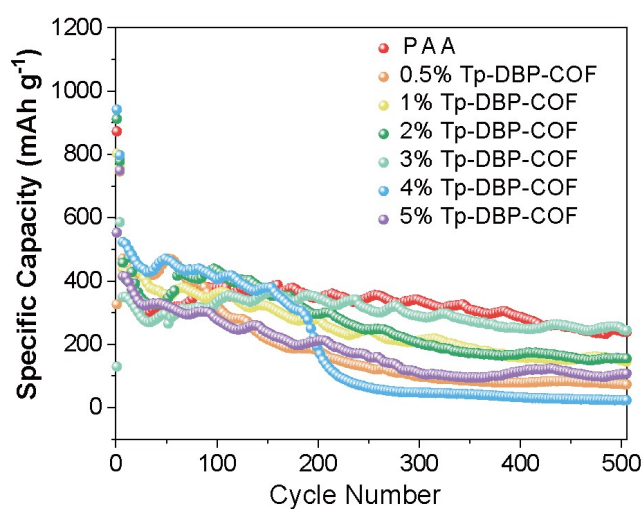

**Figure S12.** Cycling performance of Si/C//Li battery equipped with Si/C bound by PAA/Tp-DBP-COF composite binders with COFs in different weight ratios over 500 cycles (0.5% - 5%).

**Table S1.** Atomistic coordinates for the AA-stacking mode of Tp-DCAP-COF optimized by using DFTB<sup>+</sup> method.

| Atom | a/x     | b/y     | c/z     |
|------|---------|---------|---------|
| C1   | 0.27784 | 0.64401 | 0.72111 |
| C2   | 0.30124 | 0.61106 | 0.71995 |
| C3   | 0.37793 | 0.60318 | 0.72352 |
| O4   | 0.28919 | 0.72767 | 0.71779 |
| C5   | 0.97399 | 0.48837 | 0.72818 |
| C6   | 0.95215 | 0.51939 | 0.73812 |
| C7   | 0.89894 | 0.49983 | 0.74025 |
| C8   | 0.86537 | 0.44624 | 0.7309  |
| C9   | 0.88737 | 0.41504 | 0.72014 |
| C10  | 0.94008 | 0.43548 | 0.71924 |
| H11  | 0.97632 | 0.56036 | 0.74587 |
| C12  | 0.88306 | 0.53858 | 0.75301 |
| N13  | 0.81217 | 0.42532 | 0.73077 |
| H14  | 0.86287 | 0.37425 | 0.71188 |
| H15  | 0.95509 | 0.40993 | 0.71027 |
| H16  | 0.79725 | 0.44968 | 0.73313 |
| H17  | 0.35065 | 0.56206 | 0.72325 |
| C18  | 0.72382 | 0.35634 | 0.72784 |
| C19  | 0.70197 | 0.39055 | 0.7276  |
| C20  | 0.62699 | 0.40143 | 0.72881 |
| O21  | 0.71012 | 0.27179 | 0.72731 |
| C22  | 0.02836 | 0.51023 | 0.72759 |
| C23  | 0.05044 | 0.48017 | 0.7427  |
| C24  | 0.10374 | 0.50007 | 0.74362 |
| C25  | 0.137   | 0.55279 | 0.72823 |
| C26  | 0.1146  | 0.58289 | 0.71218 |
| C27  | 0.06191 | 0.56221 | 0.71227 |
| H28  | 0.0261  | 0.44014 | 0.75555 |
| C29  | 0.12348 | 0.46568 | 0.76232 |
| N30  | 0.18997 | 0.5734  | 0.72789 |
| H31  | 0.13875 | 0.62284 | 0.69906 |
| H32  | 0.04645 | 0.58671 | 0.69915 |
| H33  | 0.20437 | 0.5486  | 0.7331  |
| H34  | 0.65497 | 0.44234 | 0.72871 |
| O35  | 0.52336 | 0.6923  | 0.76958 |
| O36  | 0.58626 | 0.67333 | 0.77245 |
| O37  | 0.41689 | 0.32768 | 0.75119 |
| O38  | 0.48132 | 0.31235 | 0.76867 |
| H39  | 0.60504 | 0.70923 | 0.78455 |
| H40  | 0.45273 | 0.27795 | 0.77512 |
| C41  | 0.35599 | 0.63383 | 0.72111 |

---

|     |         |         |         |
|-----|---------|---------|---------|
| C42 | 0.38894 | 0.69019 | 0.71995 |
| C43 | 0.39682 | 0.77475 | 0.72352 |
| O44 | 0.27233 | 0.56152 | 0.71779 |
| C45 | 0.51163 | 0.48562 | 0.72818 |
| C46 | 0.48061 | 0.43276 | 0.73812 |
| C47 | 0.50017 | 0.39911 | 0.74025 |
| C48 | 0.55376 | 0.41913 | 0.7309  |
| C49 | 0.58496 | 0.47234 | 0.72014 |
| C50 | 0.56452 | 0.50459 | 0.71924 |
| H51 | 0.43964 | 0.41597 | 0.74587 |
| C52 | 0.46142 | 0.34448 | 0.75301 |
| N53 | 0.57468 | 0.38685 | 0.73077 |
| H54 | 0.62575 | 0.48862 | 0.71188 |
| H55 | 0.59007 | 0.54516 | 0.71027 |
| H56 | 0.55032 | 0.34757 | 0.73313 |
| H57 | 0.43794 | 0.78859 | 0.72325 |
| C58 | 0.64366 | 0.36748 | 0.72784 |
| C59 | 0.60945 | 0.31142 | 0.7276  |
| C60 | 0.59857 | 0.22556 | 0.72881 |
| O61 | 0.72821 | 0.43833 | 0.72731 |
| C62 | 0.48977 | 0.51813 | 0.72759 |
| C63 | 0.51983 | 0.57026 | 0.7427  |
| C64 | 0.49993 | 0.60367 | 0.74362 |
| C65 | 0.44721 | 0.58421 | 0.72823 |
| C66 | 0.41711 | 0.53171 | 0.71218 |
| C67 | 0.43779 | 0.4997  | 0.71227 |
| H68 | 0.55986 | 0.58596 | 0.75555 |
| C69 | 0.53432 | 0.65779 | 0.76232 |
| N70 | 0.4266  | 0.61657 | 0.72789 |
| H71 | 0.37716 | 0.51591 | 0.69906 |
| H72 | 0.41329 | 0.45974 | 0.69915 |
| H73 | 0.4514  | 0.65577 | 0.7331  |
| H74 | 0.55766 | 0.21263 | 0.72871 |
| O75 | 0.3077  | 0.83106 | 0.76958 |
| O76 | 0.32667 | 0.91293 | 0.77245 |
| O77 | 0.67232 | 0.08921 | 0.75119 |
| O78 | 0.68765 | 0.16897 | 0.76867 |
| H79 | 0.29077 | 0.89581 | 0.78455 |
| H80 | 0.72205 | 0.17478 | 0.77512 |
| C81 | 0.36617 | 0.72216 | 0.72111 |
| C82 | 0.30981 | 0.69876 | 0.71995 |
| C83 | 0.22525 | 0.62207 | 0.72352 |
| O84 | 0.43848 | 0.71081 | 0.71779 |
| C85 | 0.51438 | 0.02601 | 0.72818 |

---

---

|      |         |         |         |
|------|---------|---------|---------|
| C86  | 0.56724 | 0.04785 | 0.73812 |
| C87  | 0.60089 | 0.10106 | 0.74025 |
| C88  | 0.58087 | 0.13463 | 0.7309  |
| C89  | 0.52766 | 0.11263 | 0.72014 |
| C90  | 0.49541 | 0.05992 | 0.71924 |
| H91  | 0.58403 | 0.02368 | 0.74587 |
| C92  | 0.65552 | 0.11694 | 0.75301 |
| N93  | 0.61315 | 0.18783 | 0.73077 |
| H94  | 0.51138 | 0.13713 | 0.71188 |
| H95  | 0.45484 | 0.04491 | 0.71027 |
| H96  | 0.65243 | 0.20275 | 0.73313 |
| H97  | 0.21141 | 0.64935 | 0.72325 |
| C98  | 0.63252 | 0.27618 | 0.72784 |
| C99  | 0.68858 | 0.29803 | 0.7276  |
| C100 | 0.77444 | 0.37301 | 0.72881 |
| O101 | 0.56167 | 0.28988 | 0.72731 |
| C102 | 0.48187 | 0.97164 | 0.72759 |
| C103 | 0.42974 | 0.94956 | 0.7427  |
| C104 | 0.39633 | 0.89626 | 0.74362 |
| C105 | 0.41579 | 0.863   | 0.72823 |
| C106 | 0.46829 | 0.8854  | 0.71218 |
| C107 | 0.5003  | 0.93809 | 0.71227 |
| H108 | 0.41404 | 0.9739  | 0.75555 |
| C109 | 0.34221 | 0.87652 | 0.76232 |
| N110 | 0.38343 | 0.81003 | 0.72789 |
| H111 | 0.48409 | 0.86125 | 0.69906 |
| H112 | 0.54026 | 0.95355 | 0.69915 |
| H113 | 0.34423 | 0.79563 | 0.7331  |
| H114 | 0.78737 | 0.34503 | 0.72871 |
| O115 | 0.16894 | 0.47664 | 0.76958 |
| O116 | 0.08707 | 0.41374 | 0.77245 |
| O117 | 0.91079 | 0.58311 | 0.75119 |
| O118 | 0.83103 | 0.51868 | 0.76867 |
| H119 | 0.10419 | 0.39496 | 0.78455 |
| H120 | 0.82522 | 0.54727 | 0.77512 |

---

**Table S2.** Performance comparison of the PAA/Tp-DCAP-COF binder with recently reported advanced binders for Si/C anodes.

| Binder system   | Active Material | Current Density/Rate                   | Cycles | Specific Capacity (mAh g <sup>-1</sup> ) | Capacity Retention (%) | Key features                         | Ref                                                        |
|-----------------|-----------------|----------------------------------------|--------|------------------------------------------|------------------------|--------------------------------------|------------------------------------------------------------|
| PAA/Tp-DCAP-COF | Si/C-1200       | 1.5C<br>(1C=1200 mAh g <sup>-1</sup> ) | 250    | 727.9                                    | 77.32                  | 0.5wt% COF as the nanofiller in PAA  | This work                                                  |
| PVA-4FBA-PEI    | Pure Si         | 0.2C                                   | 200    | 1867.5                                   | 82.1                   | Ultrafast self-healing polymer       | <i>Small Methods</i> <b>2025</b> , <i>9</i> , 2401544      |
| DC MIN@PAA      | Si/C            | 1C                                     | >1000  | -                                        | -                      | 5 wt% mechanical interlocked network | <i>J. Am. Chem. Soc.</i> <b>2024</b> , <i>146</i> , 34491. |
| X-PAA/PSUOH     | Pure Si         | -                                      | 300    | 3572                                     | 71                     | Combine PAA with terpolymer          | <i>J. Mater. Chem. A</i> <b>2025</b> , <i>13</i> , 8355.   |
